# Supplementary material for: Efficacy of Internet-Based Self-Monitoring Interventions on Maternal and Neonatal Outcomes in Perinatal Diabetic Women: A Systematic Review and Meta-Analysis
Source: PubMed Central journal article supplement (PMC5004058; doi:10.2196/jmir.6153), 2016-08-15
Supplement: jmir_v18i8e220_app3.pdf [file jmir_v18i8e220_app3.pdf]

### Multimedia Appendix 3

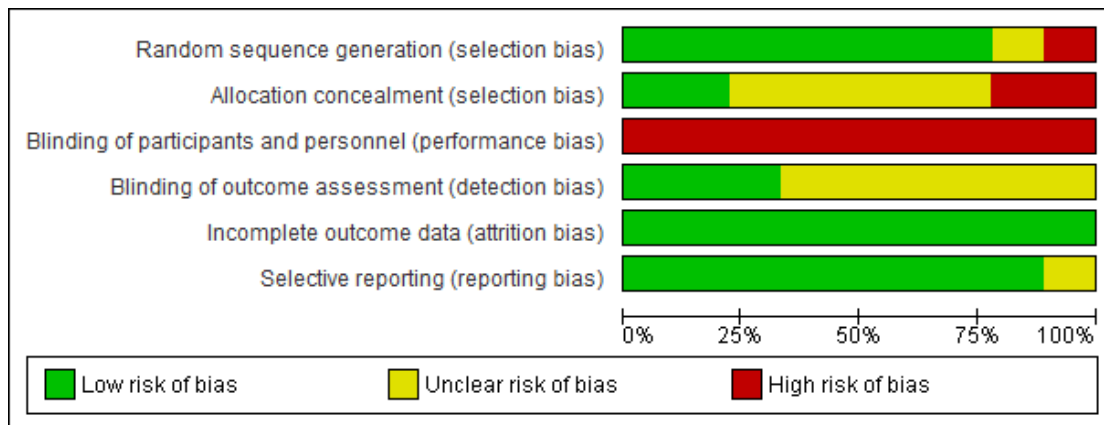

Risk of bias graph.
